# Supplementary material for: Author Correction: A HIF independent oxygen-sensitive pathway for controlling cholesterol synthesis
Source: PubMed Central journal article supplement (PMC10965996; doi:10.1038/s41467-024-47041-w), 2024-03-26
Supplement: 41467_2024_47041_MOESM1_ESM.pdf [file 41467_2024_47041_MOESM1_ESM.pdf]

## **Supplementary Information:**

### **A HIF independent oxygen-sensitive pathway for controlling cholesterol synthesis**

**Supplementary Figures 1-7**

**Supplementary Tables 1-6**

**Supplementary References**

**Supplementary Fig.1: Hypoxia promotes SREBP2 degradation.**

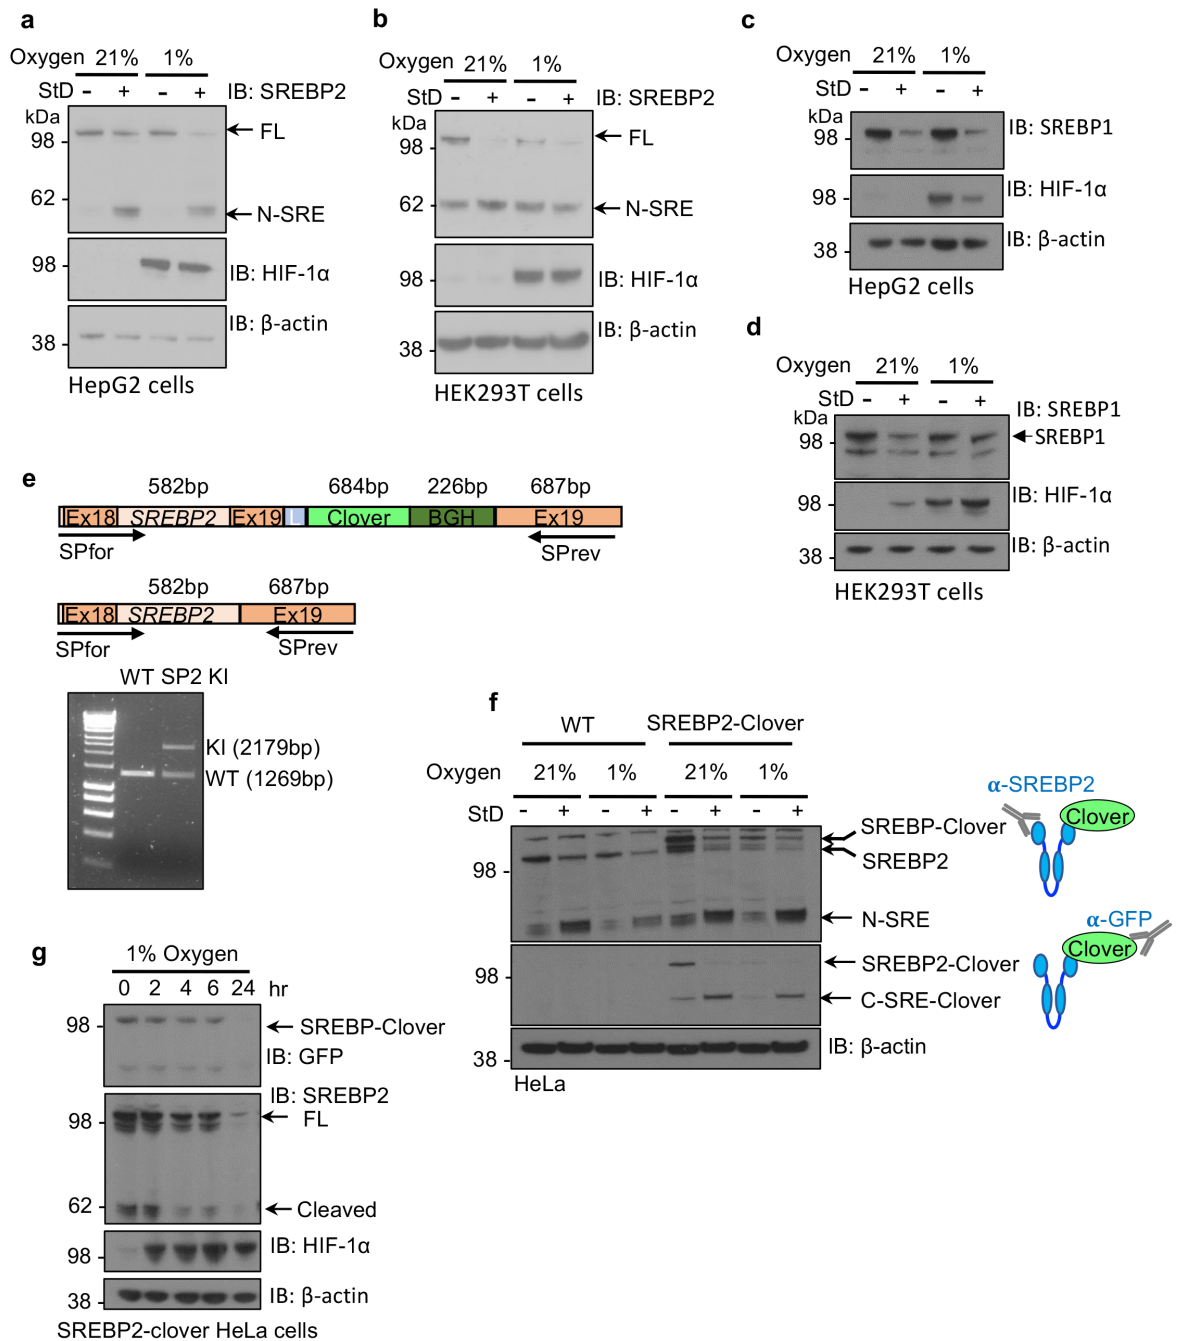

(a, b) SREBP2 processing in HepG2 cells (a) or HEK23T cells (b) treated with or without StD in 21% and 1% oxygen for 40 hr. Immunoblots representative of 3 independent experiments. (c, d) SREBP1 levels in HepG2 cells (c) or HEK23T cells (d) treated with or without StD in 21% and 1% oxygen for 40 hr. Immunoblots representative of 2 independent experiments. (e) PCR confirmation of Clover knock-in at the C-terminus of SREBP2. Genomic DNA was extracted from parental HeLa cells and clonal SREBP2-Clover knock-in cells, and amplified using the primers indicated. The presence of the 2179bp fragment confirmed incorporation of Clover to the C-terminus in the knock-in cells (KI), and was not observed in the parental cells that only encoded WT SREBP2. Representative of 2 validation experiments (f) SREBP2 processing in HeLa (WT) or HeLa SREBP2-Clover cells treated with or without StD for 40 hr. Cells were exposed to 1% oxygen for the last 16 hr as indicated. SREBP2 antibody

recognises the N-terminal region, whereas the GFP antibody detects the Clover tag. C-SRE, cleaved C-terminal region following processing in StD. **(g)** Time-course analysis of SREBP2 in HeLa SREBP2-Clover knock-in cells in 1% oxygen for up to 24 hr. Immunoblots in **(f)** and **(g)** representative of 3 independent experiments. Source data are provided as a Source Data file.

**Supplementary Fig.2: Hypoxia overrides the canonical sterol-sensing response.**

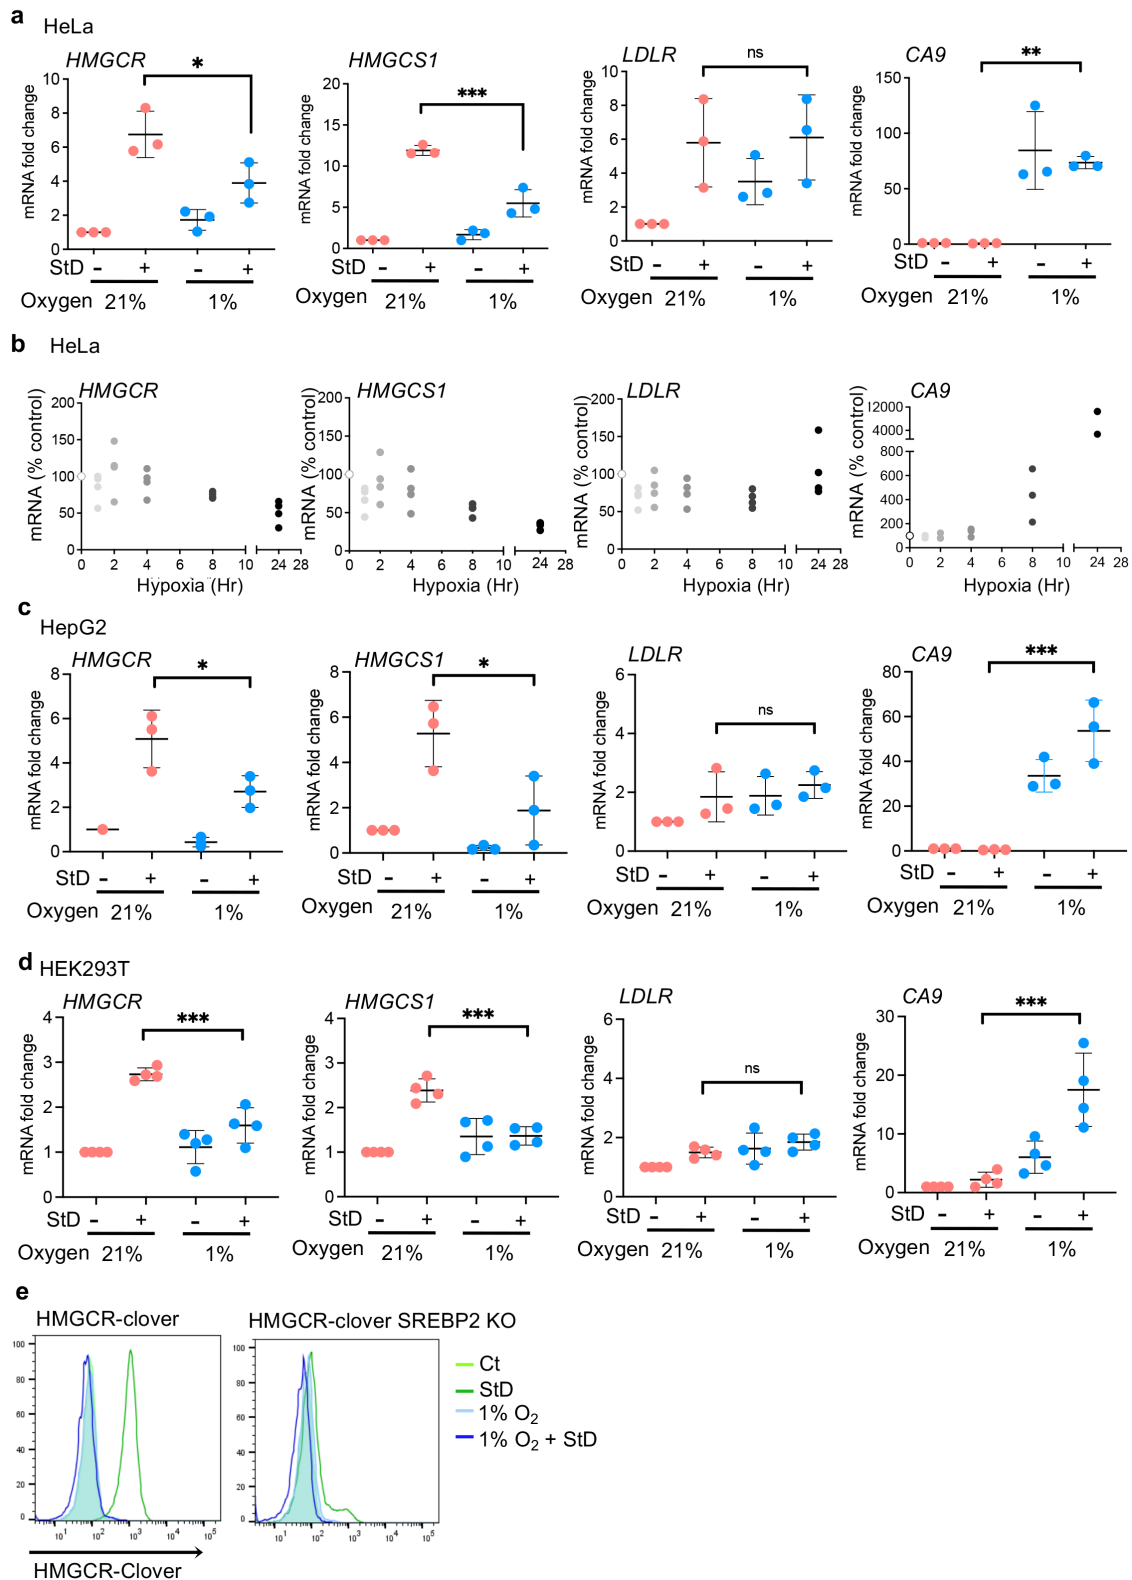

(a) mRNA expression of SREBP2 target genes (*HMGCRCR* and *HMGCS1*), the SREBP1 and 2 target *LDLR*, and the HIF-1 target gene *CA9* in HeLa cells treated with or without sterol depletion (StD) in 21% and 1% oxygen for 42 hr. StD 21% oxygen versus 1% oxygen *HMGCRCR*,  $P=0.02$ , *HMGCS1*,  $P<0.0001$ , *LDLR*,  $P=0.99$ , *CA9*,  $P=0.007$ .  $n=4$  biological repeats except *CA9* where  $n=3$  biological repeats, mean  $\pm$  SD.

\* $P \leq 0.05$ , \*\* $P \leq 0.001$  Two-way ANOVA. **(b)** Time-course of mRNA expression of SREBP2 target genes (*HMGCR* and *HMGCS1*), the SREBP1 and 2 target *LDLR*, and the HIF-1 target gene *CA9* in HeLa cells incubated in StD conditions and 1% oxygen for up to 24 hr.  $n=3$  biological repeats, mean  $\pm$  SD. **(c, d)** mRNA expression of SREBP2 target genes (*HMGCR* and *HMGCS1*), the SREBP1 and 2 target *LDLR*, and the HIF-1 target gene *CA9* in HepG2 **(c)** or HEK293T cells **(d)** treated with or without StD in 21% and 1% oxygen for 42 hr.  $n=3$  biological repeats **(c)** and 4 biological repeats **(d)**, mean  $\pm$  SD. \* $P \leq 0.05$ , \*\*\* $P \leq 0.001$  Two-way ANOVA. **(e)** Control HeLa *HMGCR*-clover or mixed KO populations of SREBP2 with or without StD for 42 hr. Cells were incubated in 21% or 1% oxygen for the final 18 hr. Cells were then analysed by live cell flow cytometry. Source data are provided as a Source Data file.

**Supplementary Fig.3: Oxygen-mediated regulation of cholesterol synthesis is independent of HIFs**

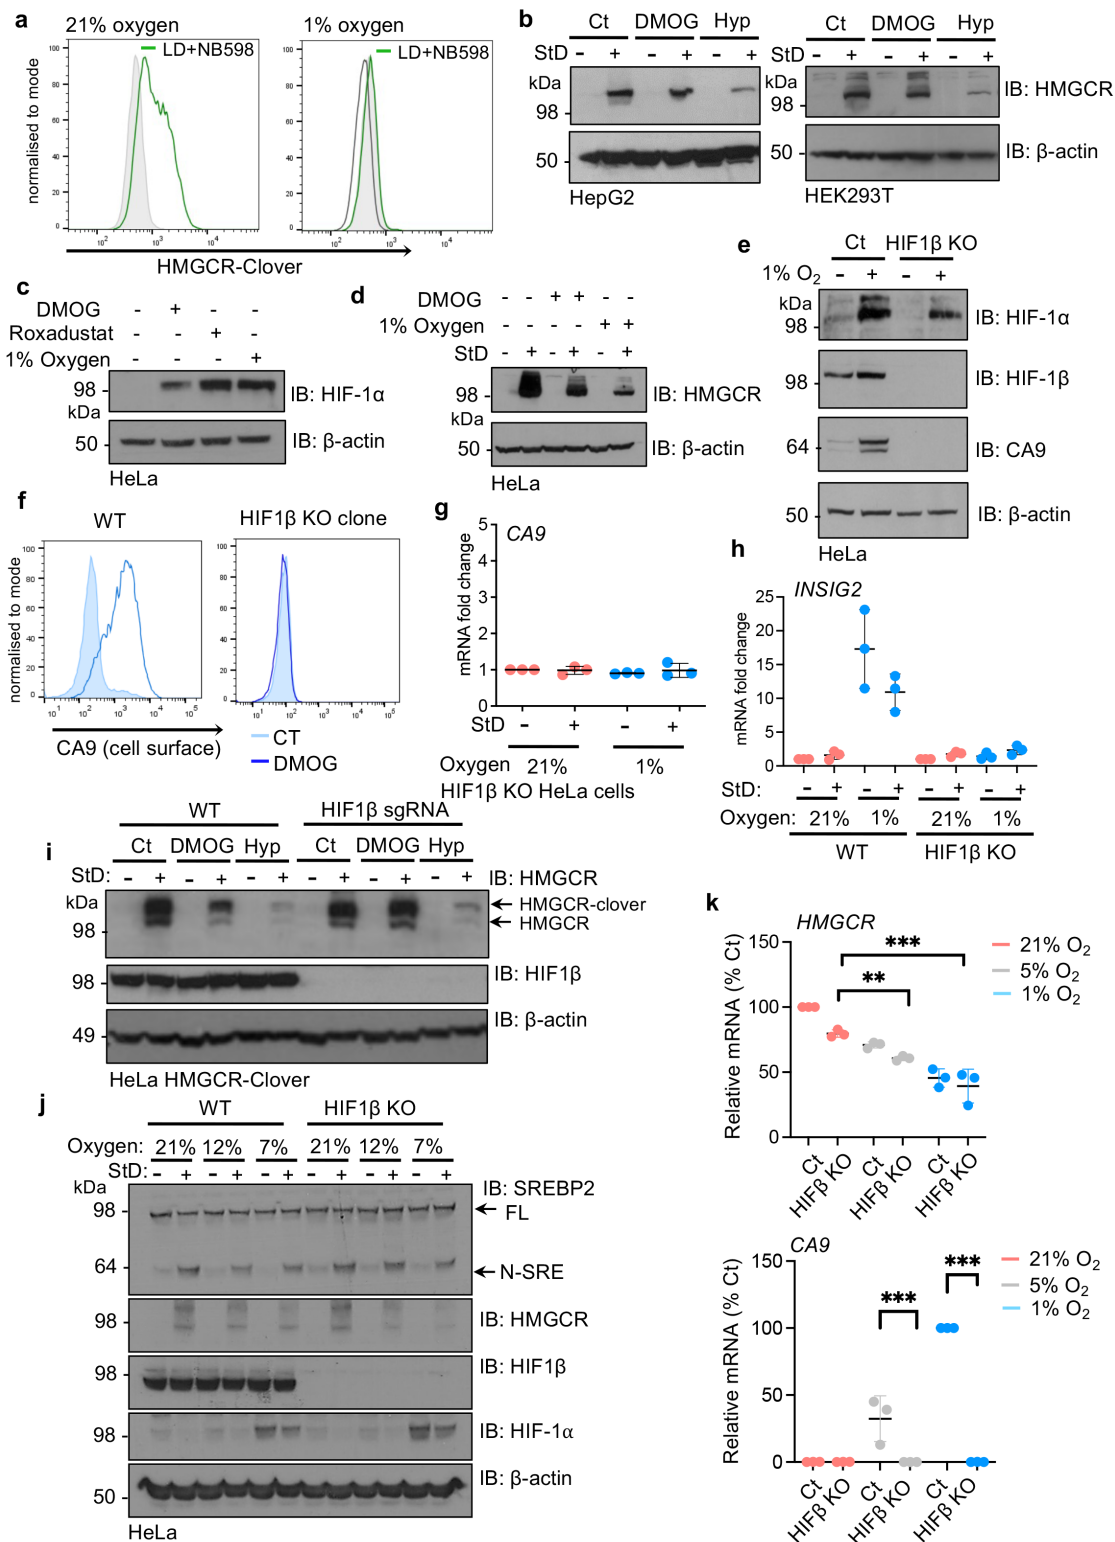

(a) Flow cytometry analysis of HMGCR-Clover levels following incubation in 21% or 1% oxygen, with or without 10% lipid depleted media plus the SQLE inhibitor NB-598 maleate (1  $\mu$ M) for 24 hr. (b, c) Endogenous HMGCR levels in HepG2 cells (b) and HEK293T cells (c) following incubation in 21% (Ct), 1 mM DMOG treatment, or 1% oxygen (Hyp), with or without StD, for 24 hr. Immunoblots representative of 2 independent experiments. (c) HIF-1 $\alpha$  levels in HeLa cells following treatment

with the 2-OG dependent dioxygenase inhibitor, DMOG (1 mM), the PHD inhibitor, Roxadustat (100  $\mu$ M), or incubation in 1% oxygen for 24 hr. **(d)** Endogenous HMGCR levels in HeLa cells with or without StD (40 hr) following incubation in 21%, 1 mM DMOG treatment, or 1% oxygen for the last 16 hr. **(e, f)** Confirmation of HIF1 $\beta$  deficient clone, with HIF-1 $\alpha$ , HIF1 $\beta$  and CA9 levels after 24 hr exposure to 1% oxygen **(e)**, or cell surface CA9 levels after 16 hr treatment with 1 mM DMOG **(f)**. Immunoblots in **(c-e)** representative of 3 independent experiments. Flow cytometry **(f)** representative of 3 independent experiments. **(g)** mRNA levels of CA9 (HIF-1 target gene) in HIF1 $\beta$  clonal KO HeLa cells following sterol depletion, with or without incubation in 1% oxygen. n=3 biological repeats, mean  $\pm$  SD. **(h)** mRNA levels of INSIG2 in HIF1 $\beta$  clonal KO or control HeLa cells with or without sterol depletion for 24 hr, followed by incubation in 21% or 1% oxygen for 16 hr. n=3 biological repeats, mean  $\pm$  SD. **(i)** HMGCR levels in control HeLa cells or following depletion of HIF1 $\beta$  (HIF1 $\beta$  sgRNA) with or without sterol depletion for 24 hr, followed by incubation in 21% or 1% oxygen, or following 1 mM DMOG treatment for 16 hr. HMGCR levels measured by immunoblot. Representative of 3 independent experiments. **(j)** SREBP2 and HMGCR levels in HeLa control or HeLa HIF1 $\beta$  KO cells cultured in 21%, 12%, or 7% oxygen, with or without StD for 24 hr. n=3 biological repeats. **(k)** mRNA levels of HMGCR (left), and CA9 (right) in sterol depleted (24 hr) HIF1 $\beta$  KO or control HeLa cells following, incubated in 21%, 5% or 1% oxygen (16 hr). HMGCR mRNA HIF1 $\beta$  KO 21% versus 5% oxygen, P<0.008, HMGCR mRNA HIF1 $\beta$  KO 21% versus 1%, P<0.0001, CA9 mRNA HIF1 $\beta$  KO 21% versus 5% oxygen, P<0.0001, CA9 mRNA HIF1 $\beta$  KO 21% versus 1%, P<0.0001, n=3 biological repeats, mean  $\pm$  SD. \*\*p $\leq$ 0.01, \*\*\*p $\leq$ 0.001 Two-way ANOVA. Source data are provided as a Source Data file.

**Supplementary Fig.4: Mass spectrometry analysis of [<sup>13</sup>C]glucose incorporation into cholesterol isotopomers.**

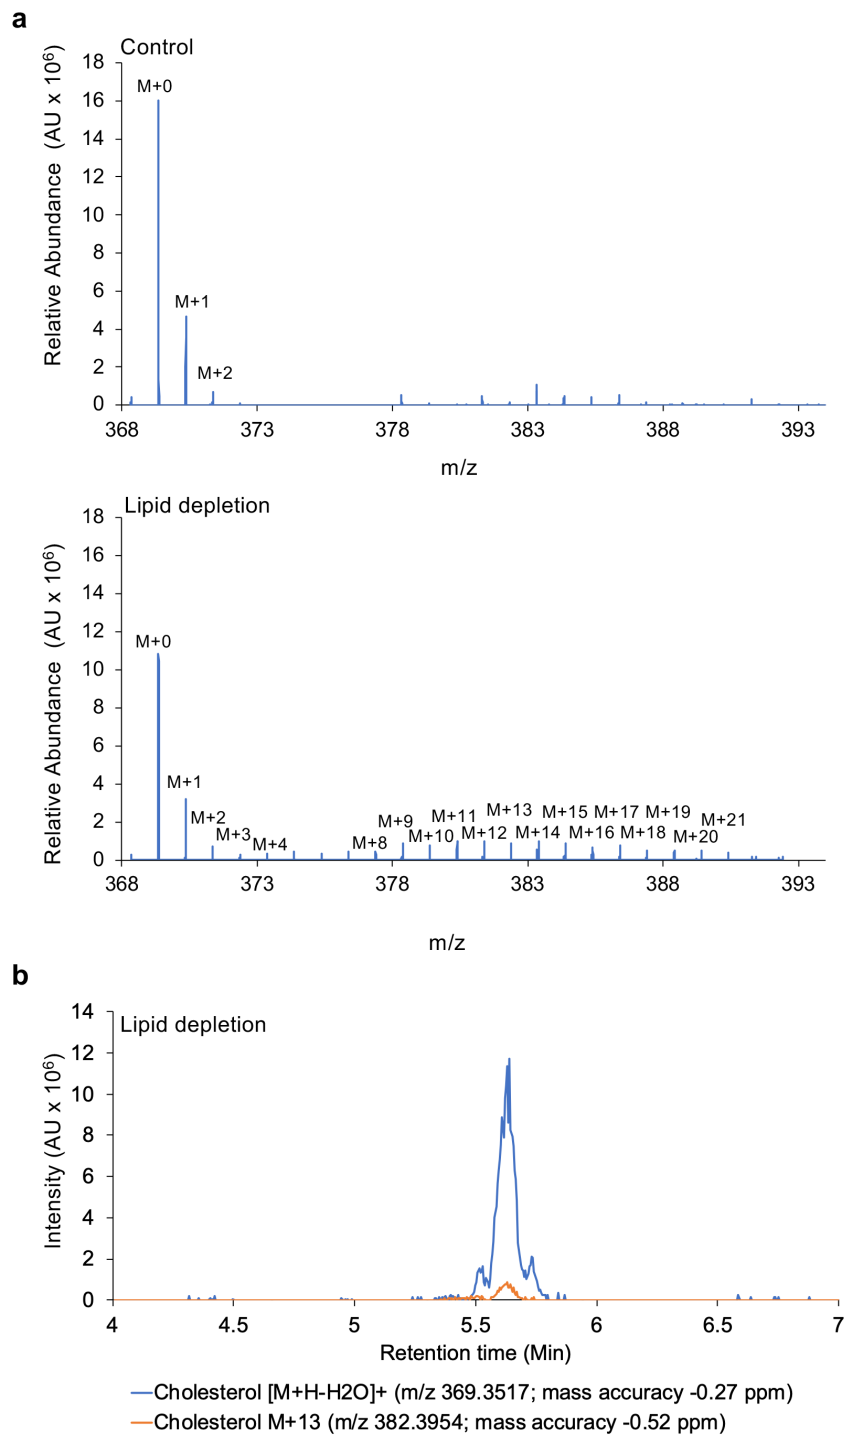

**(a, b)** Illustrative mass spectra for HeLa cells treated with (a, top panel) or without lipid deletion (a, bottom panel), and a chromatograms of unlabelled cholesterol (M+H-H<sub>2</sub>O) and M+13 cholesterol from the lipid depleted sample **(b)**. The raw data is included in Supplementary Data 4. Source data are provided as a Source Data file.



**Supplementary Fig.5: The E3 ligases RNF145, GP78, Hrd1, and E2 enzyme UBE2G2 degrade HMGR in hypoxia.**

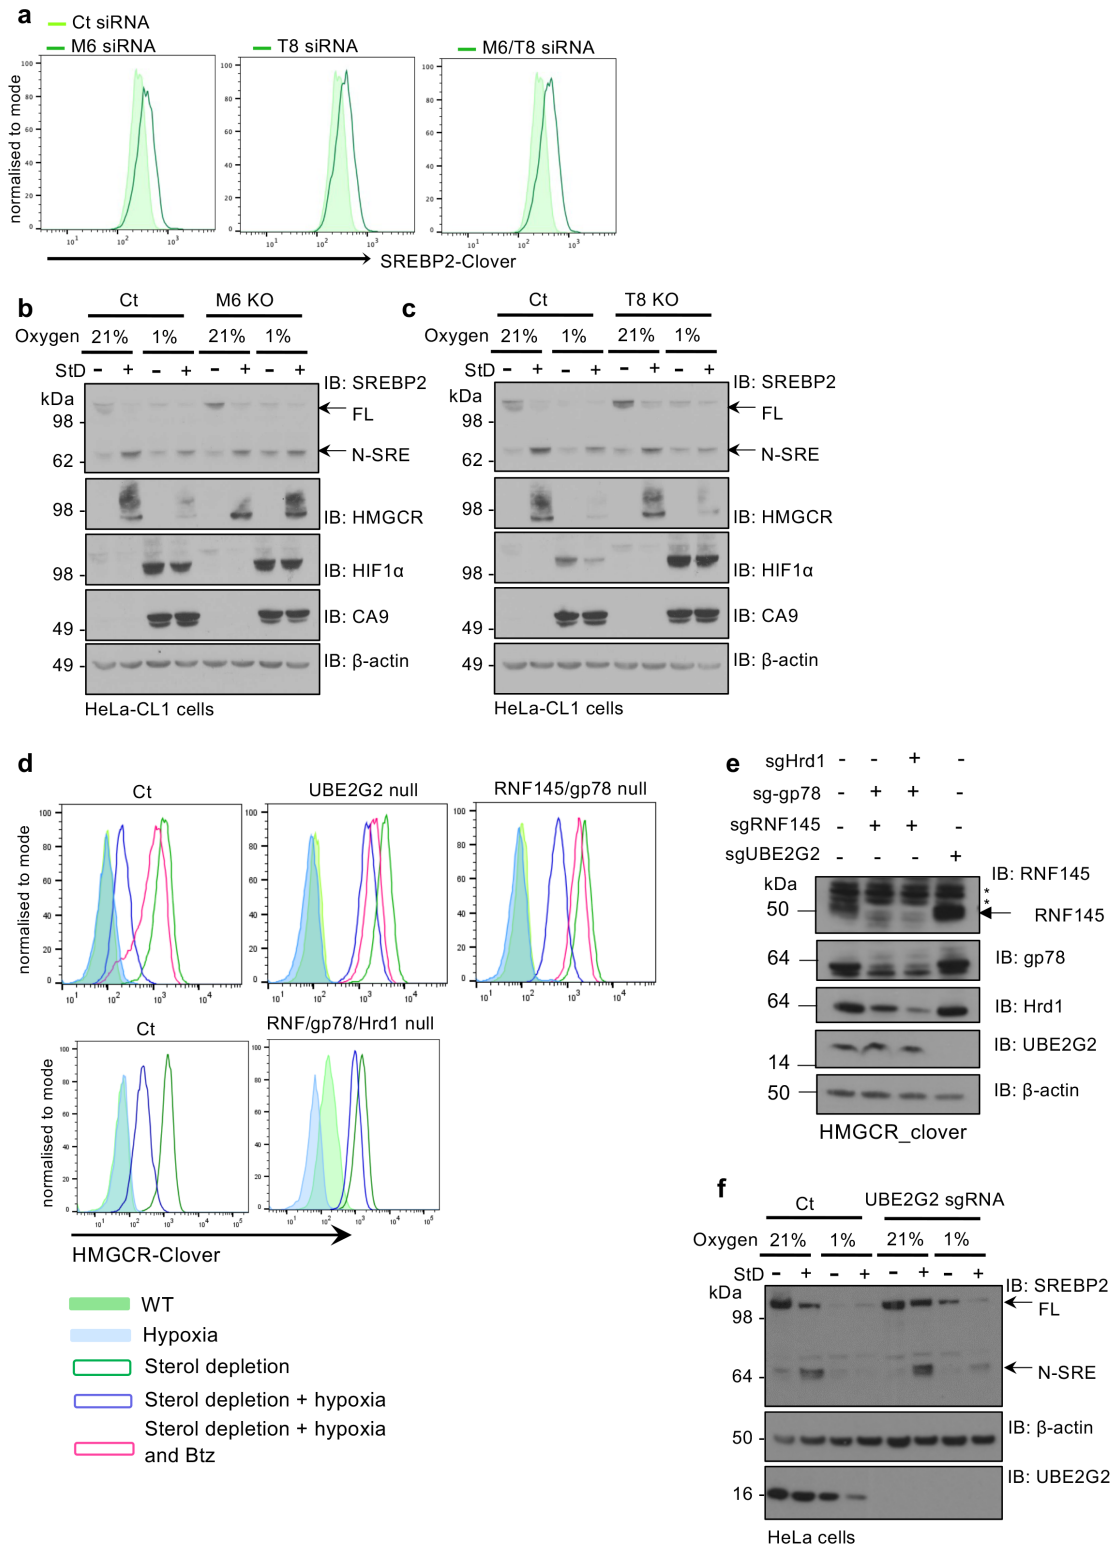

(a) SREBP2-Clover knock-in levels, measured by flow cytometry, in HeLa cells following siRNA-mediated depletion of MARCHF6 (M6), TRC8 (T8), or combined M6/T8 depletion. The data depicted in the three panels originated from the same experiment and as such the control plot is the same in

all panels. **(b, c)** HeLa mCherry-CL1 control (Ct), MARCHF6 **(b)** or TRC8 **(c)** HeLa mCherry-CL1 clonal null cells were treated with StD for 42 hr, with or without 1% oxygen for the final 18 hr. SREBP2 processing and HMGCR levels were analysed by immunoblot. Representative of 3 independent experiments. **(d, e)** HeLa HMGCR-Clover control, UBE2G2 deficient, RNF145/gp78 deficient, or RNF145/gp78/HRD1 deficient cells were generated by sgRNA. Cells were placed under StD conditions for 42 hr, with or without hypoxia 1% oxygen for the final 18 hr. StD cells were also treated with 20nM bortezomib (Btz) for the final 18 hr. HMGCR levels were analysed by flow cytometry **(d)** or immunoblot **(e)**. **(f)** SREBP2 levels in control or UBE2G2 deficient (sgRNA) HeLa cells followed StD with or without incubation in 1% oxygen as described. **(d-f)** Representative of three independent experiments. Source data are provided as a Source Data file.

### Supplementary Fig.6: Transcriptional regulation of *MARCHF6* and *TRC8*

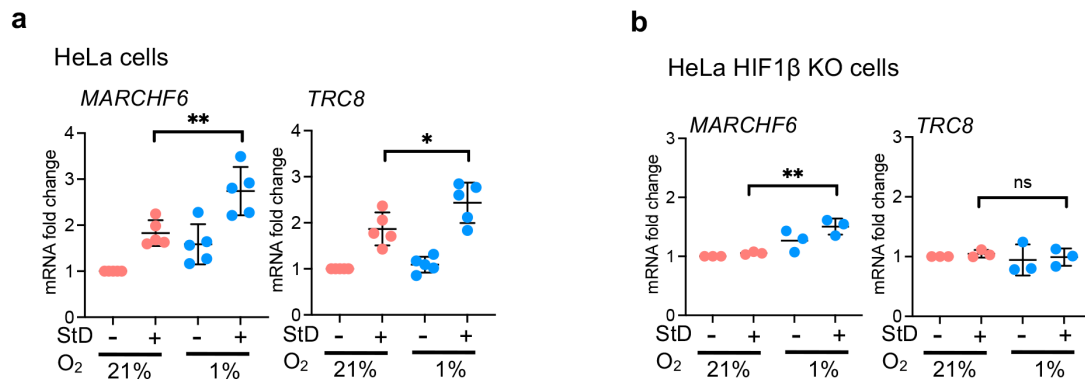

**(a, b)** HeLa control **(a)** or HIF1 $\beta$  null clonal cells **(b)** were sterol depleted for 42 hr, with or without 1% oxygen for the final 18 hr and *HMGCR*, *MARCHF6*, and *HMGCR* mRNA levels measured by qPCR. **(a)** *MARCHF6* mRNA cells StD 21% versus 1% oxygen,  $P=0.006$ , *TRC8* mRNA cells StD 21% versus 1% oxygen,  $P=0.04$ , **(b)** *MARCHF6* mRNA HIF1 $\beta$  KO cells StD 21% versus 1% oxygen,  $P=0.006$ , *TRC8* mRNA HIF1 $\beta$  KO cells StD 21% versus 1% oxygen,  $P=0.006$ .  $n=5$  biological repeats **(a)** and 3 biological repeats **(b)**, mean  $\pm$  SD. \* $P\leq 0.05$ , \*\* $P\leq 0.01$  Two-way ANOVA. Source data are provided as a Source Data file.

**Supplementary Fig.7: Hypoxia promotes cholesterol auxotrophy in tumour cells by suppressing cholesterol synthesis.**

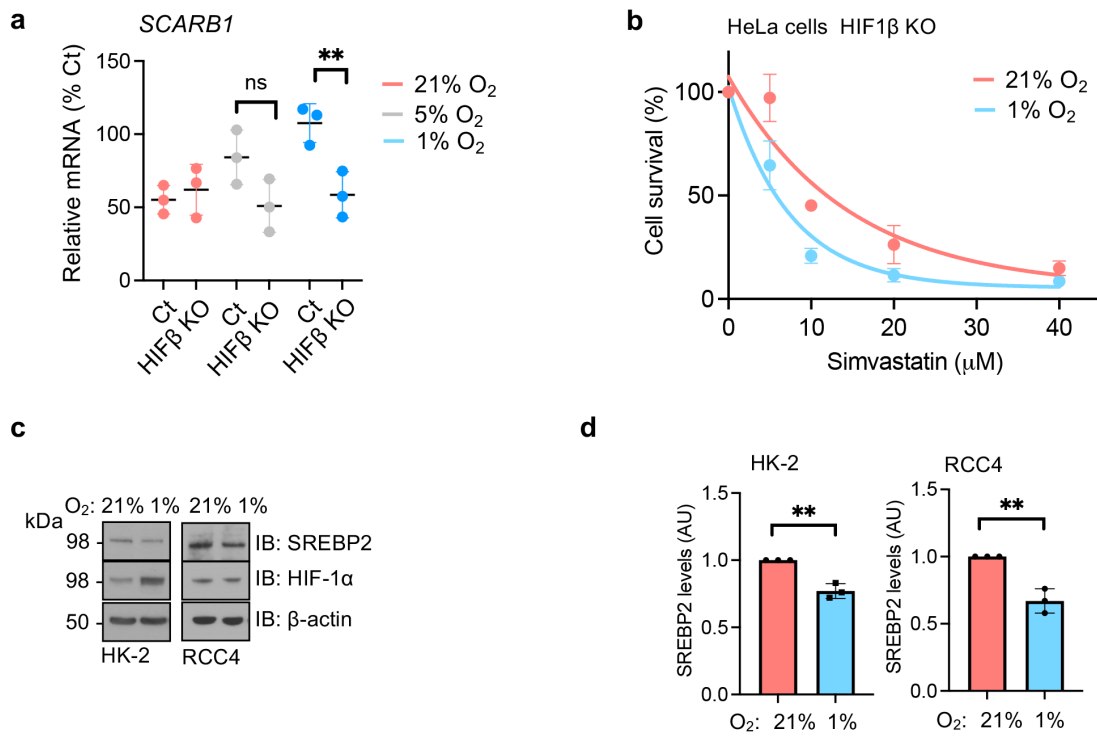

(a) mRNA levels of *SCARB1* in HIF1β KO or control HeLa cells with or without StD for 24 hr, followed by incubation in 21% or 1% oxygen for 16 hr. *SCARB1* mRNA cells Ct versus HIF1β KO in 5% oxygen,  $P=0.07$ , *SCARB1* mRNA cells Ct versus HIF1β KO in 1% oxygen,  $P=0.008$ .  $n=3$  biological repeats, mean  $\pm$  SD.  $**p\leq 0.01$ , Two-way ANOVA. (b) HeLa HIF1β null cells were incubated in 21% or 1% oxygen for 48 hr with simvastatin as indicated. Cell viability was measured by Cytotox staining at 48 hr.  $n=3$  biological repeats, mean  $\pm$  SD. (c, d) SREBP2 levels in HK2 or RCC4 cells incubated in 21% or 1% oxygen for 24 hr. SREBP2 levels were measured by immunoblot (c) and quantified using ImageJ (d). HK-2 cell SREBP2 protein levels in 21% versus 1% oxygen,  $P=0.002$ , RCC4 cell SREBP2 protein levels in 21% versus 1% oxygen,  $P=0.003$ .  $n=3$  biological repeats, mean  $\pm$  SD.  $**p\leq 0.01$ , unpaired two sample student T-Test. AU = Arbitrary Units. Source data are provided as a Source Data file.

**Supplementary Table 1: Reagents**

| <b>Reagents</b>                               | <b>Source</b>                | <b>Identifier</b> |              |
|-----------------------------------------------|------------------------------|-------------------|--------------|
| Antibodies                                    |                              |                   | Dilution use |
| β-actin                                       | Sigma Aldrich                | A2228             | 1:20,000     |
| HA                                            | Covance                      | 16B12             | 1:1000       |
| HA                                            | Roche                        | 11867423001       | 1:1000       |
| UBE2G2                                        | Santa Cruz Biotechnology     | sc-100613         | 1:1000       |
| HIF1α                                         | BD Transduction Laboratories | 619959            | 1:1000       |
| HIF2α                                         | Cell Signaling               | 7096S             | 1:1000       |
| HIF1β                                         | Cell Signaling               | 5537S             | 1:1000       |
| CA9 (Carbonic Anhydrase 9) M75                | Absolute Antibodies          | AB00414-1         | 1:2000       |
| HMG CoA Reductase                             | Santa Cruz Biotechnology     | sc-271595         | 1:1000       |
| Hrd1                                          | Abgent                       | AP2184a           | 1:1000       |
| RNF145                                        | ProteinTech                  | 24524-1-AP        | 1:1000       |
| gp78                                          | ProteinTech                  | 16675-1-AP        | 1:1000       |
| Ubiquitin                                     | Cell Signaling               | 3936              | 1:2000       |
| SREBP2                                        | R&D Systems                  | AF7119            | 1:1000       |
| Anti-goat HRP                                 | Jackson ImmunoResearch       | 115-35-146        | 1:20,000     |
| Anti-mouse HRP                                | Jackson ImmunoResearch       | 115-035-045       | 1:20,000     |
| Anti-rabbit HRP                               | Jackson ImmunoResearch       | 111-035-045       | 1:20,000     |
| Anti-rat HRP                                  | Jackson ImmunoResearch       | 112-35-003        | 1:20,000     |
| Alexa Fluor Anti-mouse 647                    | Invitrogen                   | A11036            | 1:1000       |
| Alexa Fluor Anti-mouse 488                    | Invitrogen                   | A31553            | 1:1000       |
| NADK                                          | Cell Signaling               | 55948             | 1:1000       |
| Chemicals, peptides, and recombinant proteins |                              |                   |              |
| FuGENE                                        | Promega                      | E5911             |              |
| Trans-IT 293                                  | Mirus                        | MIR-2705          |              |
| Trans-IT HeLa Monster                         | Mirus                        | MIR-2900          |              |
| Lipofectamine RNAiMAX                         | Invitrogen                   | 13778150          |              |
| MG132                                         | Sigma Aldrich                | M8699             |              |
| Bortezomib (Velcade)                          | Gift from Alfred Goldberg    | N/A               |              |
| Lipoprotein-deficient serum (LPDS)            | Biosera                      | FB-1001L/10       |              |
| Digitonin                                     | Calbiochem                   | 300410            |              |

|                                      |                          |             |  |
|--------------------------------------|--------------------------|-------------|--|
| Mevastatin                           | Sigma Aldrich            | M2537       |  |
| Simvastatin                          | Sigma Aldrich            | S6196       |  |
| DMOG                                 | Sigma Aldrich            | D3695       |  |
| Roxadustat (FG-4592)                 | Selleckchem              | S1007       |  |
| Blasticidin                          | Cambridge Bioscience     | 14499       |  |
| Hygromycin                           | Cambridge Bioscience     | 2589-1000   |  |
| Puromycin                            | Cambridge Bioscience     | P097        |  |
| Cycloheximide                        | Sigma Aldrich            | 01810       |  |
| Hoechst                              | BioTechne                | 5117/50     |  |
| Protoscript II reverse transcriptase | New England Biolabs      | M0368       |  |
| Power SYBR Green Master Mix          | Thermo Fisher Scientific | 4368577     |  |
| cOmplete Protease Inhibitor Cocktail | Roche                    | 11697498001 |  |
| Denerase                             | c-Lecta                  | 20804       |  |
| Benzonase                            | Sigma Aldrich            | E1014       |  |
| NuPAGE 4 to 12%, Bis-Tris gel        | Thermo Fisher            | #NP0322BOX  |  |
| Methanol                             | Sigma Aldrich            | #34860      |  |
| [C <sup>13</sup> ] glucose           | Sigma Aldrich            | 389374      |  |
| DMEM                                 | Sigma Aldrich            | D6429       |  |
| RPMI-1640                            | Sigma Aldrich            | R8758       |  |
| MES Running Buffer                   | Thermo Fischer           | NP0002      |  |
| ECL Supersignal                      | Thermo Fischer           | A38556      |  |
| Supersignal West Pico PLUS           | Thermo Fischer           | 34577       |  |
| PureLink RNA mini kit                | Thermo Fisher Scientific | #12183025   |  |
| Genra Puregene Core kit              | Qiagen                   | #158722     |  |
| NADP+/NAPDH Assay Kit                | Abcam                    | Ab65349     |  |
| NB-598 Maleate                       | Apexbio                  | A3647-APE   |  |

**Supplementary Table 2: Plasmids**

| Plasmids                                         |                                       |                    |
|--------------------------------------------------|---------------------------------------|--------------------|
| Bassik lab Human CRISPR-Cas9 deletion library    | Morgens et al <sup>1</sup>            | Addgene #101926-34 |
| Toronto KnockOut (TKO) CRISPR Library- Version 3 | Mair et al <sup>2</sup>               | Addgene #90294     |
| pKLV-U6gRNA-EF(BbsI) -PGKpuro2ABFP               | Ochiai et al <sup>3</sup>             | Addgene #62348     |
| LentiCRISPRv2                                    | Sanjana et al <sup>4</sup>            | Addgene #52961     |
| Lenti-Cas9-T2A-Puro                              | Hart et al <sup>5</sup>               | Addgene #73310     |
| LentiCas9-Blast                                  | Sanjana et al <sup>4</sup>            | Addgene #52962     |
| pHRSIN-FLAG-NLS-Cas9-NLS-pGK-Hygro               | Ortmann et al <sup>6</sup>            | N/A                |
| pHRSIN-pSFFV-HA-pPGK-Puro                        | Stefanovic-Barrett et al <sup>7</sup> | N/A                |
| pMD.G (Lentiviral VSVG)                          | Burr et al <sup>8</sup>               | N/A                |
| pMD.GagPol (Lentiviral Gag/Pol)                  | Burr et al <sup>8</sup>               | N/A                |
| SREBF2 image clone 6169568                       | Source Bioscience                     | IRATp970B0781D     |
| HA-SREBP2                                        | This paper                            | N/A                |

**Supplementary Table 3: sgRNA sequences**

| Gene          | Sequence (5' → 3')   |
|---------------|----------------------|
| <i>HIF1β</i>  | CAGTCCTCCGTCTCCTCACC |
| <i>HRD1</i>   | GGTGTCTTTGGGCAACTGA  |
| <i>MARCH6</i> | TATCATCCTTGTGTATGTAC |
| <i>TRC8</i>   | GCACGATGCAGAACCGGCTT |
| <i>UBE2G2</i> | CATGGGCTACGAGAGCAGCG |
| <i>RNF145</i> | TGTTAAATGTGGCCCTG    |
| <i>gp78</i>   | GTTAGCTGGTCCGGCTCGCC |

**Supplementary Table 4: Primers for generation of SREBP2 plasmids and knock-in**

| Primer name                    | Sequence (5' → 3')                                             |
|--------------------------------|----------------------------------------------------------------|
| HA_SREBP2_FL_fwd               | GCTTATCCTTACGACGTGCCTGACTACGCCGATCC<br>GACGACAGCGGCGAGCTGGGTGG |
| FL_SREBP2_notag_rev            | GCCTGCAGGTCGACTCTAGAGTCGC TCAGGAGGCGGCAATGGCAGTG               |
| SREBP2 5' arm for              | CAGCGGCCGCGGTGCCAGGGCGTGCC CTTGGGCTCCCCGGGCGCGACTAG            |
| SREBP2 5' arm rev              | GCTCACCATGGATCCACCAGATCCGCCACCA GATCCGCCACCAGATCCGCCGATCGG     |
| SREBP2 3' arm for              | CCAGCTGGGGCTCGAGATAA CTCGTATAGCATAACATTATACG                   |
| SREBP2 3' arm rev              | GAGATCCACTAGAGTGTGGCGGCC GCATTCTTATAATCAGCATCATGATGTG          |
| SREBP2 3' arm rev              | GAGATCCACTAGAGTGTGGCGGCC GCATTCTTATAATCAGCATCATGATGTG          |
| SREBP2_0_0 sgRNA<br>(knock-in) | GGCTGAGCCTGGTGGTCAGG                                           |
| SREBP2_1_0 sgRNA<br>(knock-in) | GTGGGCTGAGCCTGGTGGTC                                           |
| SREBP2_3_0 sgRNA<br>(knock-in) | GTGGAGGGGTGGGCTGAGCC                                           |
| SREBP2_4_0 sgRNA<br>(knock-in) | GAAATCGAGAGAGAGGTGGA                                           |
| SPfor                          | CACCTCTCGCCTCTCTGAGAATG                                        |
| SPrev                          | GAGTGGGAAGGAACAGGACAATTA                                       |

**Supplementary Table 5: Primers used in the mutagenesis screens**

| <b>HMGCR_Clover Bassik<br/>Library screen</b><br>Primer name | Sequence (5' → 3')                                                                        |
|--------------------------------------------------------------|-------------------------------------------------------------------------------------------|
| Outer_Fwd                                                    | AGGCTTGGATTTCTATAACTTCGTATAGCATAACATTATAC                                                 |
| Outer_Rev                                                    | ACATGCATGGCGTAATACGGTTATC                                                                 |
| P5_inner_Fwd                                                 | AATGATACGGCGACCACCGAGATCTACACTCTCTTGTGGAAAGGACGAAACACCG                                   |
| P5_index_inner_Rev                                           | CAAGCAGAAGACGGCATAACGAGATNNNNNNNGTGACTGGAGTTCAGAC<br>GTGTGCTCTCCGATCCGACTCGGTGCCACTTTTTTC |
| Illumina sequencing<br>primer                                | AGACTATAAGTATCCCTTGGAGAACCACCTTGTGG                                                       |
| <b>SREBP2_Clover TKOv3</b><br>Primer name                    | Sequence (5' → 3')                                                                        |
| Outer_Fwd                                                    | GAGGGCCTATTTCCCATGATTC                                                                    |
| Outer_Rev                                                    | CAAACCCAGGGCTGCCTTGGAA                                                                    |

|                            |                                                                                                    |
|----------------------------|----------------------------------------------------------------------------------------------------|
| Inner_Fwd                  | AATGATACGGCGACCACCGAGATCTACACTCTCTTGTGGAAAGGACGAGGTACCG                                            |
| PCR2_inner_Rev             | CAAGCAGAAGACGGCATACGAGATNNNNNNNGTGACTGGAGTTCAGACGTGTGCTC<br>TTCCGATCTATTTAACTTGCTATTTCTAGCTCTAAAAC |
| Illumina sequencing primer | ACACTCTCTTGTGGAAAGGACGAGGTACCG                                                                     |

**Supplementary Table 6: Quantitative PCR primers**

| Primer name | Sequence (5' → 3')       |
|-------------|--------------------------|
| β-actin fw  | CTGGGAGTGGGTGGAGGC       |
| β-actin rv  | TCAACTGGTCTCAAGTCAGTG    |
| CA9 fw      | GCCGCCTTTCTGGAGGA        |
| CA9 rv      | TCTTCCAAGCGAGACAGCAA     |
| HMGCR fw    | CGTGGAAATGGCAATTTTAGGTCC |
| HMGCR rv    | ATTTCAAGCTGACGTACCCCT    |
| HMGCS1 fw   | GATGTGGGAATTGTTGCCCTT    |
| HMGCS1 rv   | ATTGTCTCTGTTCCAACCTCCAG  |
| INSIG2 fw   | TAATGCGGTGTGTAGCAGTCT    |
| INSIG2 rv   | GTCCAATGGATAGTGCAGCCA    |
| LDLR fw     | ACCAACGAATGCTTGGACAAC    |
| LDLR rv     | ACAGGCACTCGTAGCCGAT      |
| SREBP2 fw   | AACGGTCATTCACCCAGGTC     |
| SREBP2 rv   | GGCTGAAGAATAGGAGTTGCC    |
| SCARB1 fw   | CCTATCCCCTTCTATCTCTCCG   |
| SCARB1 rv   | GGATGTTGGGCATGACGATGT    |
| MARCHF6 fw  | CACCTGAGAAACCGCTTTA      |
| MARCHF6 rv  | CCGTGAAGGCATATCTGGAGA    |
| TRC8 fw     | ATCGACGCCATCTTCAACTCC    |
| TRC8 rv     | AAGCTGACGTGTTGTAGGCAC    |



## Supplementary References.

- 1 Morgens, D. W. *et al.* Genome-scale measurement of off-target activity using Cas9 toxicity in high-throughput screens. *Nature communications* **8**, 15178, doi:10.1038/ncomms15178 (2017).
- 2 Mair, B. *et al.* Essential Gene Profiles for Human Pluripotent Stem Cells Identify Uncharacterized Genes and Substrate Dependencies. *Cell reports* **27**, 599-615.e512, doi:10.1016/j.celrep.2019.02.041 (2019).
- 3 Ochiai, H., Sugawara, T. & Yamamoto, T. Simultaneous live imaging of the transcription and nuclear position of specific genes. *Nucleic Acids Res* **43**, e127, doi:10.1093/nar/gkv624 (2015).
- 4 Sanjana, N. E., Shalem, O. & Zhang, F. Improved vectors and genome-wide libraries for CRISPR screening. *Nature methods* **11**, 783-784, doi:10.1038/nmeth.3047 (2014).
- 5 Hart, T. *et al.* High-Resolution CRISPR Screens Reveal Fitness Genes and Genotype-Specific Cancer Liabilities. *Cell* **163**, 1515-1526, doi:10.1016/j.cell.2015.11.015 (2015).
- 6 Ortmann, B. M. *et al.* The HIF complex recruits the histone methyltransferase SET1B to activate specific hypoxia-inducible genes. *Nature genetics* **53**, 1022-1035, doi:10.1038/s41588-021-00887-y (2021).
- 7 Stefanovic-Barrett, S. *et al.* MARCH6 and TRC8 facilitate the quality control of cytosolic and tail-anchored proteins. *EMBO Rep* **19**, doi:10.15252/embr.201745603 (2018).
- 8 Burr, S. P. *et al.* Mitochondrial Protein Lipoylation and the 2-Oxoglutarate Dehydrogenase Complex Controls HIF1alpha Stability in Aerobic Conditions. *Cell metabolism* **24**, 740-752, doi:10.1016/j.cmet.2016.09.015 (2016).
